# Supplementary material for: Lack of β1 integrins in enteric neural crest cells leads to a Hirschsprung-like phenotype
Source: Oxford University Press journal article supplement (doi:10.1242/dev.02346), 2006-03-29
Supplement: dev02346supptables.pdf [file dev02346supptables.pdf]

**Table S1. Primary antibodies used for immunostaining**

| Antibody                           | Host       | Source                                             | Dilution |
|------------------------------------|------------|----------------------------------------------------|----------|
| p75 <sup>NTR</sup>                 | Rabbit     | Promega                                            | 1/200    |
| Phox2b                             | Rabbit     | Brunet J.F. (Pattyn et al., 1997)                  | 1/1000   |
| Neurofilament 160 kD               | Mouse      | DSHB, 2H3 clone                                    | 1/100    |
| HuD                                | Mouse      | Weston J.A. (Marusich et al., 1994)<br>16A11 clone | 1/200    |
| S100                               | Rabbit     | Dako                                               | 1/400    |
| Brain-fatty acid binding protein   | Rabbit     | Müller T. (Kurtz et al., 1994)                     | 1/500    |
| Vasoactive intestinal peptide      | Rabbit     | Progen                                             | 1/100    |
| Calcitonin gene-related peptide    | Guinea Pig | Progen                                             | 1/500    |
| Substance P                        | Rabbit     | Chemicon                                           | 1/5000   |
| Neuronal nitric oxide synthase     | Rabbit     | Chemicon                                           | 1/1000   |
| Neuropeptide Y                     | Rabbit     | Biogenesis                                         | 1/200    |
| Proliferating cell nuclear antigen | Mouse      | Zymed Laboratories (PCNA kit)                      | 1/5      |
| 5-bromo-2'-deoxyuridine            | Mouse      | BD Biosciences                                     | 1/250    |
| Cleaved caspase 3                  | Rabbit     | Cell signalling technology                         | 1/50     |
| E-Cadherin                         | Rat        | Takara Biomedicals, ECCD2 clone                    | 1/100    |
| N-Cadherin                         | Mouse      | Zymed Laboratories                                 | 1/100    |
| Cadherin 6                         | Rabbit     | Mege R.M. (Marthiens et al., 2002)                 | 1/800    |
| Cadherin 11                        | Rabbit     | Zymed Laboratories                                 | 1/100    |
| L1-CAM                             | Mouse      | BAbCO, 74-5H7 clone                                | 1/200    |
| NCAM                               | Rabbit     | Goridis C. (Gennarini et al., 1986)                | 1/100    |
| β1 integrin                        | Rat        | Chemicon                                           | 1/200    |
| β3 integrin                        | Mouse      | BD Biosciences                                     | 1/200    |
| β5 integrin                        | Rabbit     | Chemicon                                           | 1/200    |
| Laminin                            | Rabbit     | Sigma                                              | 1/100    |
| Tenascin                           | Rabbit     | Chemicon                                           | 1/50     |
| Collagen IV                        | Rabbit     | Progen                                             | 1/100    |
| Fibronectin                        | Rabbit     | Neomarkers                                         | 1/200    |

## References

- Gennarini, G., Hirsch, M. R., He, H. T., Hirn, M., Finne, J. and Goridis, C.** (1986). Differential expression of mouse neural cell-adhesion molecule (N-CAM) mRNA species during brain development and in neural cell lines. *J. Neurosci.* **6**, 1983-1990.
- Kurtz, A., Zimmer, A., Schnutgen, F., Bruning, G., Spener, F. and Muller, T.** (1994). The expression pattern of a novel gene encoding brain-fatty acid binding protein correlates with neuronal and glial cell development. *Development* **120**, 2637-2649.
- Marthiens, V., Padilla, F., Lambert, M. and Mege, R. M.** (2002). Complementary expression and regulation of cadherins 6 and 11 during specific steps of motoneuron differentiation. *Mol. Cell Neurosci.* **20**, 458-475.
- Marusich, M. F., Furneaux, H. M., Henion, P. D. and Weston, J. A.** (1994). Hu neuronal proteins are expressed in proliferating neurogenic cells. *J. Neurobiol.* **25**, 143-155.
- Pattyn, A., Morin, X., Cremer, H., Goridis, C. and Brunet, J. F.** (1997). Expression and interactions of the two closely related homeobox genes Phox2a and Phox2b during neurogenesis. *Development* **124**, 4065-4075.

**Table S2. Murine gene-specific primers used for RT-PCR**

| Gene        | Sens primer (5'-3')   | Antisense primer (5'-3') |
|-------------|-----------------------|--------------------------|
| <i>lacZ</i> | GTTACGATGCGCCCATCTA   | CAGGTCAAATTCAGACGGC      |
| Cad6        | GACATCAGAGATAACATTGTC | TTCGTAGGCATAGGTGGC       |
| N-cad       | TCACGGTGACAGATGTCAAT  | GTGCTGAATGCCTTTAGCTA     |
| Cad11       | GAATGACCAATCAGATGGG   | AAGAATTGGTTCCAGACCC      |
| NCAM        | AATCATACCCAGCCTGGC    | CAAAGTCCAGATGAGATCC      |
| L1-CAM      | GTGTAGTGGTGCATGAGG    | TAGGTCTCCATTCTGGCC       |
